## CORRECTION

# Correction: Ammonia excretion in aquatic invertebrates: new insights and questions (doi: 10.1242/jeb.169219)

**Dirk Weihrauch and Garrett J. P. Allen**

There was an error published in *J. Exp. Biol.* (2018) **221**, jeb169219 (doi: 10.1242/jeb.169219).

The second author's name was incorrectly displayed. The correct version is shown above. This has been corrected in the online full-text and PDF versions.

We apologise to the authors and readers for any inconvenience this may have caused.

## COMMENTARY

# Ammonia excretion in aquatic invertebrates: new insights and questions

Dirk Weihrauch\* and Garrett J. P. Allen

**ABSTRACT**

Invertebrates employ a variety of ammonia excretion strategies to facilitate their survival in diverse aquatic environments, including freshwater, seawater and the water film surrounding soil particles. Various environmental properties set innate challenges for an organism's ammonia excretory capacity. These include the availability of NaCl and the respective ion-permeability of the organism's transport epithelia, and the buffering capacity of their immediate surrounding medium. To this end, some transporters seem to be conserved in the excretory process. This includes the Na<sup>+</sup>/K<sup>+</sup>(NH<sub>4</sub><sup>+</sup>)-ATPase (NKA), the NH<sub>3</sub>/CO<sub>2</sub> dual gas-channel Rhesus (Rh)-proteins and novel ammonia transporters (AMTs), which have been identified in several invertebrates but appear to be absent from vertebrates. In addition, recent evidence strongly suggests that the hyperpolarization-activated cyclic nucleotide-gated K<sup>+</sup> channel (HCN) plays a significant role in ammonia excretion and is highly conserved throughout the animal kingdom. Furthermore, microtubule-dependent vesicular excretion pathways have been found in marine and soil-dwelling species, where, unlike freshwater systems, acid-trapping of excreted ammonia is difficult or absent owing to the high environmental buffering capacity of the surroundings. Finally, although ammonia is known to be a toxic nitrogenous waste product, certain marine species readily maintain potentially toxic hemolymph ammonia as a sort of ammonia homeostasis, which suggests that ammonia is involved in physiological processes and does not exist simply for excretion. Such findings are discussed within this Commentary and are hypothesized to be involved in acid–base regulation. We also describe excretory organs and processes that are dependent on environmental constraints and indicate gaps in the current knowledge in these topics.

**KEY WORDS:** Ammonia excretion, Ammonia transporters, Rhesus proteins, Hyperpolarization-activated cyclic nucleotide-gated channel, Microtubule network

**Introduction**

Compared with physiological studies in mammals or economically relevant vertebrates such as fish, literature concerning nitrogen excretion processes of invertebrates is scarce. This is puzzling, considering that invertebrates compose ~95% of all animal species, dominate the world's ecosystems and benefit humankind (Prather et al., 2013; Wilson, 1987). Here, we summarize and discuss our current understanding of ammonia excretory organs and strategies undertaken by invertebrates that inhabit various aquatic

environments, including ion-poor and poorly buffered freshwater, well-buffered seawater, and animals inhabiting extremely buffered and Na<sup>+</sup>-poor water films of soil particles. This Commentary describes ammonia toxicity and its excretion, numerous internal and external excretory organs of invertebrates, and our current understanding of how environmental conditions influence excretory mechanisms. Additionally, we discuss recent findings demonstrating that some invertebrates maintain an 'ammonia homeostasis' through bidirectional ammonia transport and how it may relate to acid–base regulation.

**The ammonia problem**

Ammonia (i.e. total NH<sub>3</sub> and NH<sub>4</sub><sup>+</sup>, T<sub>Am</sub>) is produced by nearly all living cells, usually as the nitrogenous waste product of amino acid catabolism, degradation of purines and pyrimidines, and probably through the 'purine nucleotide cycle' of invertebrates (Campbell, 1991; Larsen et al., 2014). Owing to the toxicity of ammonia, most animals must maintain efficient ammonia excretory strategies or invest metabolic energy to transform ammonia into alternative, less harmful, nitrogenous end products such as urea or uric acid. The vast majority of aquatic invertebrates – including freshwater-dwelling larval stages of terrestrial insects – are ammonotelic and excrete nitrogenous waste predominantly in the form of ammonia, rather than relying on ammonia transformation (Larsen et al., 2014; Weihrauch et al., 2004; Wright, 1995).

Accumulation of ammonia in the extracellular fluid of animals causes numerous deleterious effects and can be caused by exposure of animals to environmental conditions that prevent net ammonia excretion. For instance, fishes exposed to high environmental ammonia (HEA) experience reduced critical swimming velocity (McKenzie et al., 2003; Shingles et al., 2001; Wicks et al., 2002), impaired 'fast-start escape' (McKenzie et al., 2009), and disturbed branchial gas exchange and oxidative metabolism (Wilkie, 1997). More information concerning ammonia toxicity of fishes can be found in review articles by Eddy (2005), Ip and co-workers (Ip et al., 2001; Ip and Chew, 2010) and Randal and Tsui (Randal and Tsui, 2002; Tsui et al., 2002). Ammonia toxicity has also been documented in several aquatic invertebrates, particularly commercially relevant crustaceans. HEA exposure in the blue shrimp *Penaeus stylirostris* reduces their total number of immune active hemocytes (Le Moullac and Haffner, 2000), while American lobster *Homarus americanus* (Young-Lai et al., 1991) and signal crayfish *Pacifastacus leniusculus* (Harris et al., 2001) experience disrupted ionoregulatory function. Dungeness crabs *Metacarcinus magister* lose their branchial ability to actively excrete ammonia following a 2 week exposure to HEA (Martin et al., 2011). In the Chinese white shrimp *Penaeus chinensis*, HEA reduces growth, polyphenol oxidase and superoxide dismutase activity (Sun and Ding, 1999), and enhances moulting in the prawn *Penaeus japonicus* (Chen and Kou, 1992). Growth rates and food consumption in farmed greenlip abalone, *Haliotis laevis*, are

University of Manitoba, Department of Biological Sciences, Winnipeg, R3T2N2, MB, Canada.

\*Author for correspondence (Dirk.weihrauch@umanitoba.ca)

 D.W., 0000-0002-3218-9093

**Glossary****Ammonotelic**

Primarily excreting ammonia as a nitrogenous waste product.

**Amphiprotic**

Capable of donating or accepting a proton.

**Catabolism**

Metabolic degradation of complex molecules to simpler molecules.

**Cell potential**

Difference in electrical charge across cellular plasma membrane.

**Co-transport**

Simultaneous transport of two substances via one transporter, no ATPase activity.

**Critical swimming velocity**

Maximal capability of fishes to swim against currents.

**Exocytosis**

Excretion of substances via fusion of vesicular and plasma membranes.

**Fast-start escape**

Rapid propulsion of fish away from threat or predator.

**Hyperpolarization**

Net negative change in cell potential.

**Metabolon**

Temporary structural–functional complex of enzymes allowing for substrate channeling, where product of one enzyme is an immediate substrate for the next.

**Metanephridia**

Internal excretory organ of annelids and Mollusca.

**Microtubule network**

Cytoskeletal arrangement of extendable tubules within cytoplasm.

**Paracellular pathway**

Pathway between cells that can allow ion leaks.

**Plicate organ**

Ammonia excretory and respiratory organ of bivalves; an epithelium located on the region connecting gills to the body.

**Protonephridia**

Internal excretory organ of Platyhelminthes, Nemertea, Rotifera and lancelets.

**Purine**

Nitrogen-containing heterocycle compound, notably adenine and guanine.

**Purine nucleotide cycle**

Metabolic pathway that deaminates adenosine monophosphate, producing ammonia, in order to eventually produce fumarate and maintain the Krebs cycle.

**Pyrimidine**

Nitrogen-containing heterocyclic compound, notably cytosine, thymine and uracil.

**Syncytium**

Single cell mass containing multiple nuclei.

also depressed by HEA (Harris et al., 1998). Ammonia excretion needs to occur efficiently to avoid these toxic effects. Invertebrates have a number of internal and external excretory organs, discussed below, that are generally multifunctional organs involved in osmoregulation, acid–base regulation and gas exchange.

**Internal excretory organs**

Internal excretory organs of invertebrates include: the excretory system in nematodes (H-cell), Malpighian tubules in insects, molluscan kidney, antennal/maxillary glands in crustaceans, coxal glands in chelicerates, protonephridia, and metanephridia. Many of these organs are recognized for their importance in the excretion of nitrogenous waste; however, little work has focused specifically on ammonia excretion. Amongst internal excretory systems, ammonia appears to be commonly collected and concentrated for excretion. Excretion of ammonia from the body fluids into the excretory systems can occur passively – where dual  $\text{NH}_3/\text{CO}_2$  gas channel

Rhesus (Rh) proteins may facilitate diffusion – or actively, typically via substitution of  $\text{K}^+$  for  $\text{NH}_4^+$  by  $\text{K}^+$ -accepting transporters. The transport of  $\text{NH}_4^+$  by  $\text{K}^+$  transporters is facilitated by the similar size and charge of these ions (Larsen et al., 2014). Concentration of ammonia within the tubules can also occur through an ‘acid-trapping’ mechanism. If the luminal side is acidified, e.g. by means of a V-type  $\text{H}^+$ -ATPase (VAT),  $\text{NH}_3$  ( $\text{p}K_a=9.3$ ) converts into the non-diffusible ionic form,  $\text{NH}_4^+$  and is thereby trapped. Below is a compilation of current hypotheses describing the role of various internal excretory organs in ammonia excretory processes.

Studies employing ion-selective microelectrodes have indicated that the three-cell excretory system of the nematode *Caenorhabditis elegans* excretes  $\text{H}^+$  and  $\text{K}^+$  (Adlimoghaddam et al., 2014), which suggests that ammonia might also be excreted by this internal method through an acid-trapping mechanism. In this system,  $\text{NH}_4^+$  likely enters the excretory cells via basolateral  $\text{K}^+$  transporters, such as  $\text{Na}^+/\text{K}^+$ -ATPase (NKA) (Adlimoghaddam et al., 2015; Leone et al., 2016) and  $\text{K}^+$  channels (Choe et al., 2000; Fehsenfeld and Weihrauch, 2016b).  $\text{NH}_4^+$  could then be excreted across the apical membrane in a similar fashion to  $\text{K}^+$  while simultaneous apical  $\text{H}^+$  excretion occurs, creating an acidic boundary layer that traps ammonia as  $\text{NH}_4^+$ , preventing its back-flow into the excretory system.

The role of the Malpighian tubules/hindgut system for the ammonia excretory processes of ammonotelic insects is poorly understood; however, the system is known to collect high concentrations of ammonia. Ammonia is actively absorbed by the midgut of larval terrestrial lepidopteran tobacco hornworm, *Manduca sexta*, then highly concentrated in the Malpighian tubules ( $\sim 25 \text{ mmol l}^{-1}$ ). Even higher concentrations were detected in the hindgut ( $\sim 60 \text{ mmol l}^{-1}$ ). The midgut and hindgut possess high mRNA expression levels of the dual  $\text{CO}_2/\text{NH}_3$  gas channel Rh proteins and VAT that might allow for facilitated ammonia uptake and acid-trapping in these tissues, respectively (Weihrauch, 2006; Weihrauch et al., 2011). Similar processes have been observed in the Malpighian tubules and posterior rectum of two aquatic mosquito larvae, *Aedes aegypti* and *Anopheles gambiae*. The tissue of both species demonstrate high VAT expression and may give rise to the acidic (pH  $\sim 6$ ) rectal cavity of *A. aegypti* (Clark et al., 2007), creating a suitable environment for  $\text{NH}_4^+$  entrapment.

Amongst crustaceans, the ultrafiltrating antennal and maxillary glands play an important role in adjusting divalent cations and are described to be analogous to the mammalian nephron (Freire et al., 2008). After filtration, ion composition is altered downstream along the sections of the gland, which may entail secretion and concentration of ammonia. The importance of this process in ammonia excretion in crustaceans is, however, inconsistent as the molecule is concentrated in urine only in some species, and its relevance to net ammonia excretion of the animal is often negligible (Weihrauch et al., 2017).

Terrestrial and semi-terrestrial crabs make extensive use of their antennal glands for ammonia excretion; for example, urine of the ghost crab *Ocypode quadrata* has exceptionally high concentrations of ammonia ( $116 \text{ mmol l}^{-1}$ ). Summaries of nitrogenous waste excretion by terrestrial and semi-terrestrial crabs are available elsewhere (Linton et al., 2017; Weihrauch et al., 2004). The molluscan kidney performs a similar function to the crustacean antennal gland in excreting ammonia. Urine of the marine bivalve *Atrina pectinate* contains  $\sim 5 \text{ mmol l}^{-1}$  ammonia – which is approximately 40 times higher than levels in their hemolymph (Suzuki, 1988). Likewise, renal sac fluid of *Octopus vulgaris*

contains  $\sim 3.2 \text{ mmol l}^{-1}$  ammonia – approximately 10 times more concentrated than levels in their blood (Hu et al., 2017).

Aquatic crustaceans, however, do not show consistent glandular ammonia excretion. The urine of *Carcinus maenas* acclimated to brackish water contains approximately three times more ammonia ( $300\text{--}400 \mu\text{mol l}^{-1}$ ) than their hemolymph, suggesting the antennal gland modifies primary filtrate to promote ammonia excretion. Freshwater blue crab, *Callinectes sapidus*, also accumulates significantly higher concentrations of urinary ammonia compared with that of its hemolymph; however, its role in total nitrogen excretion is negligible (Cameron and Batterton, 1978). In the edible crab *Cancer pagurus* and the Chinese mitten crab *Eriocheir sinensis*, by contrast, urine and hemolymph contain equimolar ammonia concentrations and do not concentrate ammonia for excretion (Weihrach et al., 2017). Overall, in aquatic crustaceans, antennal and maxillary glands play a minor role in ammonia excretion compared with the multifunctional gills.

### External excretory organs

Invertebrates make consistent use of their external excretory organs for removal of ammonia from their extracellular fluids. External appendages are in direct contact with external media and come in a variety of structures. Examples include gills of crustaceans, molluscs and some insects, anal papillae of mosquito larvae (Chasiotis et al., 2016), the plicate organ of mussels (Thomsen et al., 2016), and the branchial appendages of marine annelids (Thiel et al., 2017). Animals lacking external appendages may excrete across the integument, as observed in leeches (Quijada-Rodriguez et al., 2015), planarians (Weihrach et al., 2012) and nematodes (Adlimoghaddam et al., 2016). While organs within the same orders may be homologous, such as the gills of freshwater and seawater crabs, the mechanism of ammonia excretion often differs and is reliant on environmental conditions. Below, external organs and their interactions with different environments are discussed.

### Excretion in freshwater

Freshwater invertebrates are faced with the problem of living in an ion-poor environment. As compensation for inevitable ion loss to the environment, external appendages, or occasionally the integument, must host mechanisms for active NaCl uptake. Meanwhile, animals must also continue to excrete ammonia to avoid its toxic effects. Ammonia excretion in freshwater species is often directly linked to osmoregulation and both processes usually occur over the same epithelia and share several key transporters. The anal papillae of freshwater *A. aegypti* larvae are actively involved in osmoregulation and also excrete ammonia through a mechanism that utilizes several transporters involved in NaCl transport, novel ammonia transporters (AMTs), as well as Rh proteins (Figs 1, 3 and 4). Freshwater ribbon leeches, *Nepheleopsis obscura*, use their integument for both NaCl uptake and ammonia excretion; however, unlike anal papillae, excretion across the integument is not  $\text{Na}^+$  coupled.

Two main ion pumps, basolateral NKA and apical VAT, drive NaCl transport across the epithelium of a freshwater organism. In general, NKA generates both low intracellular  $[\text{Na}^+]$  and a negative cell potential. VAT further increases cellular hyperpolarization by extruding cytosolic  $\text{H}^+$  to the environment (directly if within the same cell, or localized in adjacent cells via gap junctions). This hyperpolarization of the cytosol and low intracellular  $[\text{Na}^+]$  allows for  $\text{Na}^+$  uptake despite the low environmental availability of the ion (Onken and Riestenpatt, 1998; Weber et al., 1993). Animals such as

*N. obscura* that use their integument for ion transport, undergo similar processes using cation/ $\text{H}^+$ -exchangers (Quijada-Rodriguez et al., 2017). Carbonic anhydrase is also involved in the process by providing intracellular  $\text{H}^+$  and  $\text{HCO}_3^-$ . Apically localized electroneutral  $\text{HCO}_3^-/\text{Cl}^-$  exchangers (AE) then use  $\text{HCO}_3^-$  provided by carbonic anhydrase as a substrate to sequester  $\text{Cl}^-$  from the environment (Henry et al., 2012). A working model for the anal papillae of *A. aegypti* larvae that partially relies on this system is provided in Fig. 1C. The model shows a significant involvement of the aforementioned cation transporters, carbonic anhydrase, as well as a highly expressed basolateral ammonium transporter (AeAMT, Fig. 1A,B).

AMTs are trimeric proteins known to transport  $\text{NH}_4^+$  in plant roots. Within the animal kingdom, however, they are only present in invertebrate species. AeAMT is believed to facilitate uptake of ammonia from the hemolymph into the epithelial syncytium specifically as  $\text{NH}_4^+$  rather than  $\text{NH}_3$ , as shown for a cloned AMT homolog from *Anopheles gambiae*, which selectively transports  $\text{NH}_4^+$  (Pitts et al., 2014) in a process likely driven by negative cell potential (Fig. 1C). The importance of AeAMT in ammonia excretion across the anal papillae is indicated by a 60% reduction in ammonia excretion following decreased AeAMT protein abundance upon RNA interference (RNAi) (Fig. 1D).

The mechanism underlying ammonia's excretion across the apical membrane of the syncytium is not as clear. It can be inferred from cytosolic pH that the vast majority of cellular ammonia exists as  $\text{NH}_4^+$ ; however, to our knowledge, there is inadequate evidence supporting the existence of a dedicated apical excretory  $\text{NH}_4^+$  transporter in invertebrates. It is possible that invertebrates use apically located AMTs to secrete  $\text{NH}_4^+$  across their excretory epithelia; data mining in GenBank has revealed that mosquitoes express at least two different AMTs and that these transporters are commonly expressed amongst invertebrates (McDonald and Ward, 2016). In the marine polychaete *Eurythoe complanata*, transcripts of three different AMTs have been identified within the branchiae, with EcAMT4 being abundantly expressed at levels around eight times higher than the  $\alpha$ -subunit of NKA in this tissue (Thiel et al., 2017). With more than one AMT being expressed within the same tissue, there is a good likelihood that these proteins are present on both the basal/basolateral and the apical membrane of the respective epithelial cells, as shown for Rh proteins and  $\text{Na}^+/\text{H}^+$  exchangers (NHEs).

Apical extrusion of ammonia can be mediated by distant relatives of the AMTs – Rh proteins (Huang and Peng, 2005) – which are ammonia transporters in both vertebrates and invertebrates. Rh proteins function as  $\text{CO}_2/\text{NH}_3$  gas channels (Endeward et al., 2008; Geyer et al., 2013; Perry et al., 2010) and have been described as a significant component in freshwater acid-trapping of apically excreted ammonia in fish gills, as well as excretory organs of planarians, leeches and nematodes (Weihrach et al., 2009). Their role in the process is to facilitate the movement of  $\text{NH}_3$  along the  $\text{NH}_3$  partial pressure ( $P_{\text{NH}_3}$ ) gradient generated by acidification of an apical unstirred boundary layer, likely produced by apical NHE or VAT. The anal papillae of *A. aegypti* express two Rh proteins (Fig. 1A) that are both responsive to HEA and alter ammonia excretion following knockdown experiments (Fig. 1D). An abundance of apically localized NHE and VAT (Fig. 1B), as well as pharmacological evidence (Fig. 1D), also support the involvement of Rh proteins and acid-trapping in *A. aegypti*.

Interestingly, some evidence has demonstrated that select Rh proteins – for example, mammalian Rhbg and RhAG – may also transport  $\text{NH}_4^+$ , possibly in a  $\text{NH}_3\text{--H}^+$  cotransport fashion. Rh

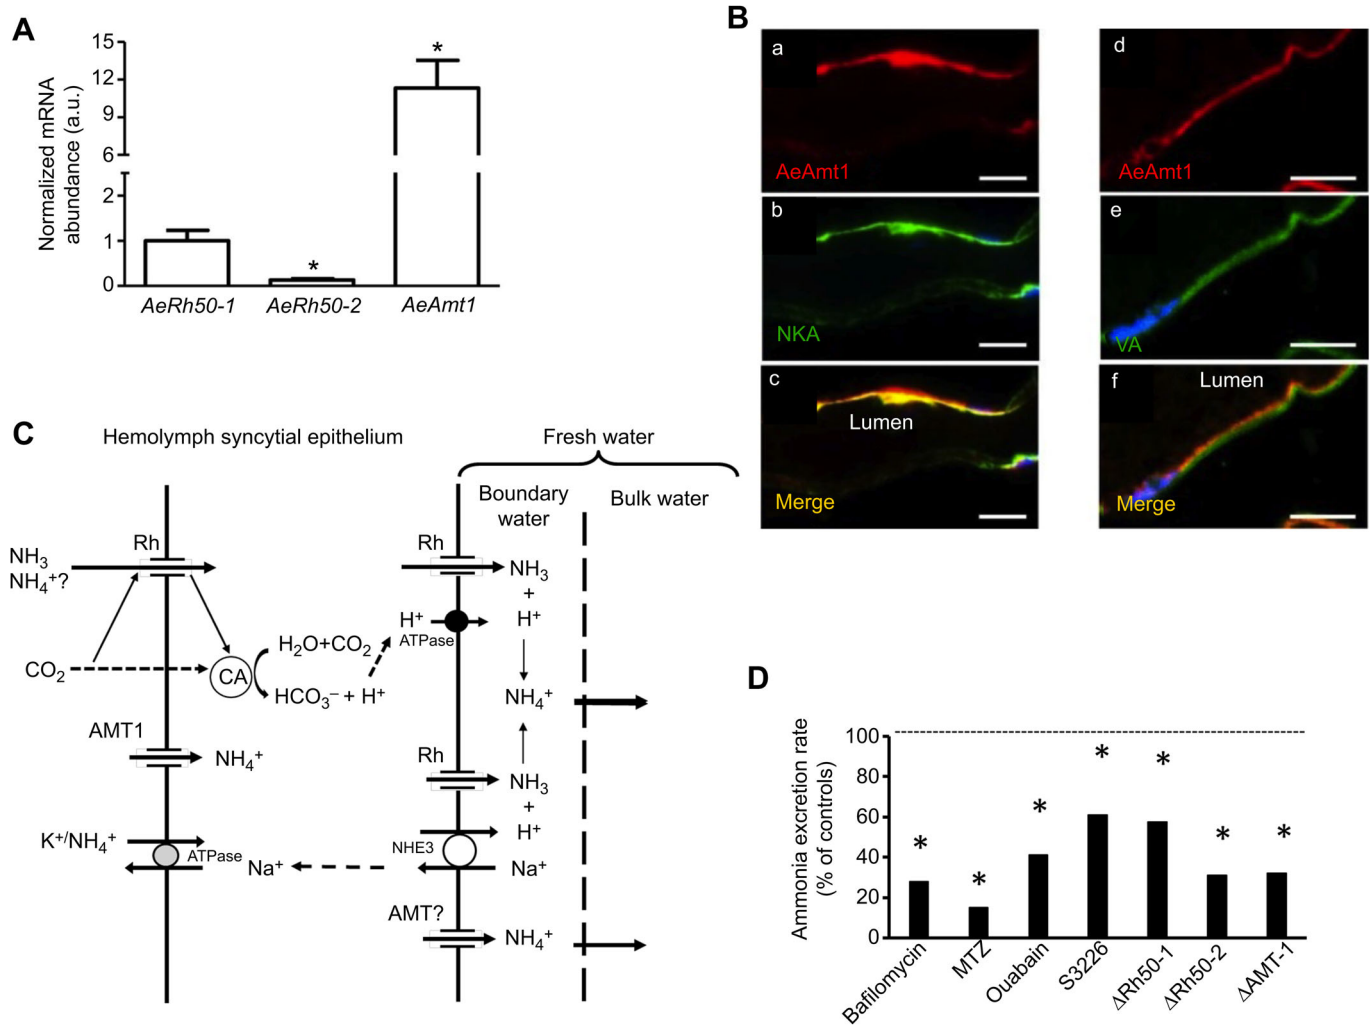

**Fig. 1. Mechanism of excretion of ammonia in the anal papillae in larvae of the mosquito *Aedes aegypti*.** (A) High relative mRNA expression levels of AeAMT1 when compared with AeRh50-1 and AeRh50-2 in the anal papillae of *A. aegypti* suggest importance in ammonia excretion processes of this transporter. (B) Co-localization of AeAMT1 and Na<sup>+</sup>/K<sup>+</sup>-ATPase (NKA) in the basal membrane of anal papillae syncytium. a, d, basal staining of AeAMT (red); b, basal staining of NKA (green); c, merge of a and b; e, apical staining of VAT (green); f, merge of d and e. Blue signal (DAPI) indicates nucleus. Scale bars: 20  $\mu$ m. (C) Current working model of the ammonia excretion mechanism in the anal papillae of *Aedes aegypti* larvae (for details, see text) supported by inhibitory effects of various pharmaceuticals and the knockdown of AeRh50-1 ( $\Delta$ Rh50-1), AeRh50-2 ( $\Delta$ Rh50-2) and AeAMT1 ( $\Delta$ AMT-1) (D). Bafilomycin A1, inhibitor of VAT; MTZ, methazolamide, inhibitor of carbonic anhydrase; ouabain, inhibitor of NKA; S3226, inhibitor of NHE3. \* Significant difference compared with controls (dotted line, control). A and B are from Chasiotis et al. (2016); C and D have been composed by the authors utilizing data from Chasiotis et al. (2016) and Durant et al. (2017).

proteins and AMTs are structurally similar as both are trimeric structures with a central canal formed by NH<sub>3</sub>-transporting molecules (Gruswitz et al., 2010), which may serve as a cation (H<sup>+</sup> or NH<sub>4</sub><sup>+</sup>) conductive pathway, as experimentally described for the plant protein AtAMT1;2 (Neuhäuser and Ludwig, 2014). While it is possible that such transport could function in invertebrate species, supporting evidence is thus far absent.

At least some freshwater species may also use vesicular transport as a mechanism of ammonia excretion. Perfusion of isolated low-conductance gills of freshwater-acclimated Chinese mitten crabs, *Eriocheir sinensis*, indicated active ammonia excretion (Weihrauch et al., 2017). Application of pharmaceuticals that compromise the microtubule network partially inhibits active excretion (~30%), suggesting that some ammonia excretion occurs through vesicular transport. Such a process would allow for ammonia excretion when the animal is faced with unfavourable environmental conditions (pH, P<sub>NH<sub>3</sub></sub>, P<sub>CO<sub>2</sub></sub> or salinity) or to eliminate/reduce the need for apical transporters.

The mechanisms of ammonia excretion used by many freshwater invertebrates need further investigation. Much of what is known assumes that the strategies employed by the anal papillae of *A. aegypti* are common to freshwater invertebrates. While these strategies are partially supported through studies of cutaneous ammonia excretion of a freshwater planarian *Schmidtea mediterranea* and the ribbon leech *N. obscura* (Quijada-Rodriguez et al., 2015; Weihrauch et al., 2012), there are also open questions that require clarification, such as the involvement of novel transporters. For example, expression of AMTs in planarians is documented (Chan et al., 2016); however, their participation in ammonia excretion has not been demonstrated, as is also the case for HCN. Apical excretion mechanisms as well as coupling of ammonia excretion to other physiological processes is also still unclear. Pharmacological manipulations of apical NHEs indicate that they are involved in ammonia excretion across the integument of *S. mediterranea* (Weihrauch et al., 2012), however, in the leech they do not appear to play a role in excretion. Recent studies found that

$\text{Na}^+$  uptake and ammonia excretion across integument of *N. obscura* are not coupled, as suggested by a lack of NHE and  $\text{Na}^+$  channel participation in ammonia excretion (Quijada-Rodriguez et al., 2017). This demonstrates that an Rh–NHE metabolon, which would perhaps assist in overcoming some thermodynamic restraints on freshwater NHE use, was improbable. Gathering mechanistic information from more invertebrates would be of use to distinguish which processes are most common and which are atypical as well as the presence and involvement of novel transporters in a greater variety of invertebrate species. Ultimately, it would be useful to determine such information while comparing speciation as well as environmental habitats.

### Excretion in brackish and seawater

Compared with fresh water, brackish and marine environments are highly buffered as a result of their high  $\text{HCO}_3^-$  content (Garrels and Thomson, 1962). This, in turn, influences the ammonia excretory strategies that can be used by the aquatic animals that live in these highly buffered waters. This is because it is difficult for an organism

to create an acidic boundary layer to facilitate ammonia excretion in a neutralising aquatic environment. In gills of marine invertebrates, an apical VAT is often absent (Fig. 2A) (Hu et al., 2017; Weihrauch et al., 2001), or is present but totally irrelevant for ammonia excretion, as occurs across the plicate organ in bivalves (Thomsen et al., 2016). Unlike freshwater species, brackish- and seawater-dwelling organisms appear to excrete ammonia with partial independence from  $\text{Na}^+$  and  $\text{Cl}^-$  transport (Weihrauch et al., 2002). Furthermore, active ammonia excretion appears to occur in several brackish and seawater invertebrate species investigated. Active excretion is observed during gill perfusions (Fig. 2D) of marine crabs despite their ‘ion-leaky’ epithelium (Martin et al., 2011; Weihrauch et al., 1999).

Investigations of branchial ammonia excretory strategies of *C. maenas* have helped develop a current working model (Fig. 2B). The process is partially independent of  $\text{Na}^+$  and  $\text{Cl}^-$  transport (Fig. 2C) (Weihrauch et al., 1998) and allows for active ammonia excretion that is dependent on an intact microtubule network, likely in the form of vesicular transport (Weihrauch et al., 2002). Ammonia

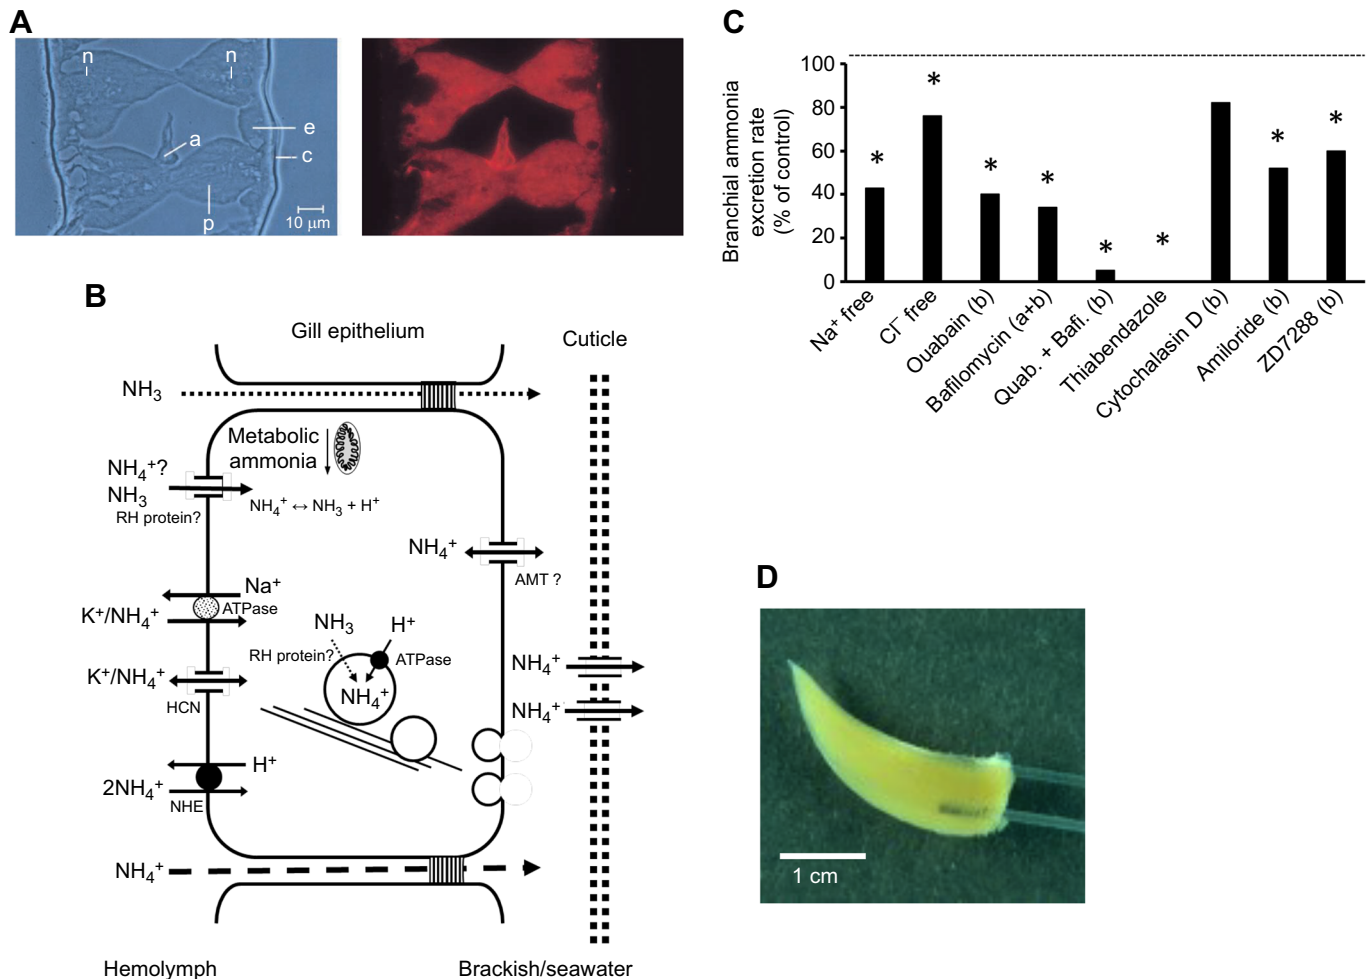

**Fig. 2. Mechanism of excretion of ammonia in the gills of the green crab *Carcinus maenas*.** (A) Cytoplasmic but not distinguished apical localization of VAT (B-subunit) in the ammonia-excreting posterior gills of *C. maenas* [left: phase-contrast; right: immunocytochemical staining (red) for B-subunit] (Weihrauch et al., 2001). p, pillar cell; c, cuticle; a, arteriole; e, epithelial cell; n, nucleus. (B) Current working model of ammonia excretion mechanism in the gills of *C. maenas* larvae (for details, see text) based on effects of various pharmaceuticals and saline modifications on the ammonia excretion rates measured over the isolated perfused gill of *C. maenas* (C), employing the isolated perfused gill (D). The microtubule-dependent mechanism allows ammonia excretion independently of environmental pH and elevated ammonia concentrations. Note that in the cuticle, amiloride-sensitive pores allow passage of  $\text{NH}_4^+$ . Ouabain, inhibitor of NKA; bafilomycin A1, inhibitor of VAT; thiabendazole, inhibitor of microtubule network; cytochalasin D, inhibitor of actin filament organization; amiloride, inhibitor of NHEs; ZD7288, inhibitor of HCN. \*Significant difference compared with controls (dotted line, control). b, basolateral application. Values in C are taken from Weihrauch et al. (2017) and Fehsenfeld and Weihrauch (2016a)

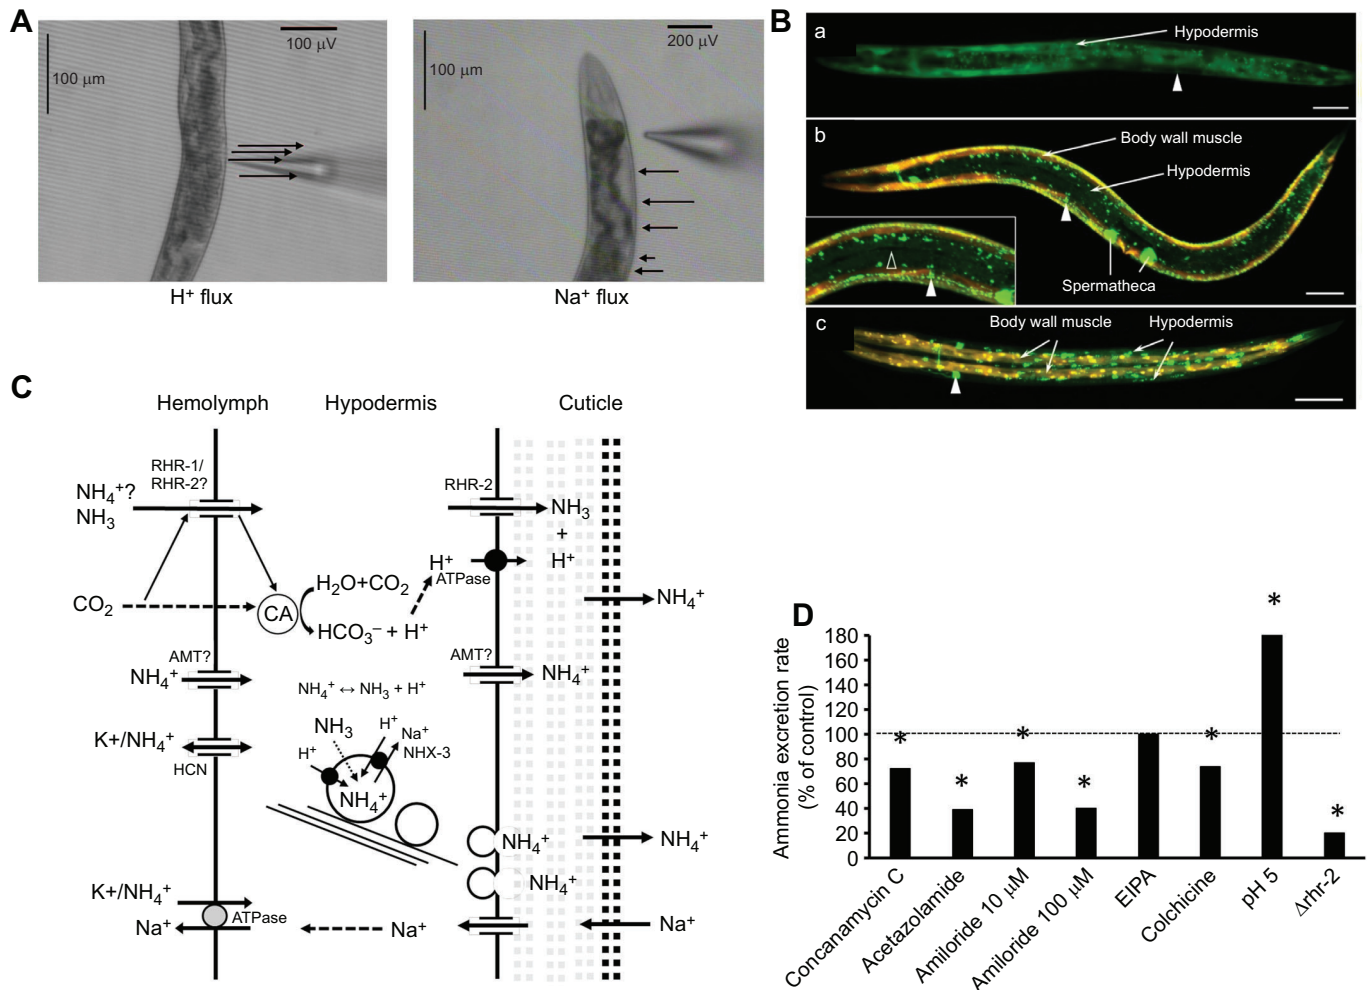

**Fig. 3. Ammonia excretion mechanism over the hypodermis of the soil nematode *Caenorhabditis elegans*.** (A) Arrows indicate H<sup>+</sup> effluxes and Na<sup>+</sup> influxes measured over the hypodermis of *C. elegans* by the scanning ion-selective electrode technique (SIET) revealed that the hypodermis is an osmoregulatory active organ. (B) Apical localization of the NH<sub>3</sub> channel RHR-2 in the hypodermis of *C. elegans* allows for acid trapping. Panel a shows adult transgenic *C. elegans* with *rhr-2* promoter-activated GFP expression. GFP expression is observed in the hypodermis and ventral nerve cord (white arrowhead). Panels b and c show transgenic *C. elegans* expressing *rhr-2* promoter-driven RHR-2::GFP protein (green) and muscle-specific *myo-3* promoter-activated mCherry (red). (b) Left lateral surface of young adult with strong RHR-2::GFP expression. Body wall muscles also express RHR-2::GFP, as detected by co-expression of mCherry, as well as the spermathecal, vulva, ventral nerve cord and a subset of head neurons. Inset shows detail of hypodermal RHR-2::GFP expression (200 μm in width). RHR-2 is detected in the dorsal and ventral hypodermal cells. Protein is absent from lateral seam cells (open arrowhead). (c) Dorsal view of a mid-staged larvae expressing RHR-2::GFP and *myo-3p::mCherry*. RHR-2::GFP is detected in the hypodermis, body wall muscle and two head neurons (white arrowhead) (reproduced from Adlimoghaddam et al., 2016). Scale bars: 50 μm (a,b), 20 μm (c). (C) Current working model of ammonia excretion mechanism across the hypodermis of *C. elegans* (for details, see text) based on effects of various pharmaceuticals, manipulation of environmental pH and knockout of apical RHR-2 on whole-animal ammonia excretion rates (D). Hypodermal ammonia excretion in *C. elegans* represents a combination of excretion mechanisms described for freshwater (low [Na<sup>+</sup>]) animals and species inhabiting buffered environments such as seawater. Concanamycin C, inhibitor of VAT; acetazolamide, inhibitor of carbonic anhydrase; low dose of amiloride, inhibitor of Na<sup>+</sup> channels; high dose of amiloride, inhibitor of Na<sup>+</sup> channels and NHEs; EIPA, inhibitor of NHEs; colchicine, inhibitor of microtubule network; pH 5, exposure to low environmental pH; Δ*rhr-2*, excretion rates of *rhr-2* knockout mutant. \*Significant difference compared with controls (dotted line, control) (Adlimoghaddam et al., 2015, 2016, 2017).

uptake from the hemolymph and into the cytoplasm of the branchial epithelium occurs via several transporters, including: NKA, a basolateral amiloride-sensitive transporter – likely an electrogenic cation/H<sup>+</sup> exchanger (Fehsenfeld and Weihrauch, 2016a; Towle et al., 1997) – and possibly an Rh protein localized in branchial tissue (Weihrauch et al., 2004). Cytoplasmic NH<sub>3</sub> is then believed to be trapped inside acidified vesicles as NH<sub>4</sub><sup>+</sup> and transported along the microtubule network to the apical membrane to be exocytosed. This mechanism, which does not depend on an apical acidification or any apical transporters, seems to be of particular significance as the gradient-driven and active branchial ammonia excretion was partially (~74%) or completely inhibited by the microtubule blockers

colchicine and thiabendazole, respectively (Weihrauch et al., 2002). Similar excretory methods have since been suggested to occur in the gills of the marine swimming crab *Portunus trituberculatus* (Ren et al., 2015), hinting that this may be an excretory strategy of marine/brackish water crustaceans.

Active excretion components aside, marine invertebrates are characterized as having ‘leaky’ branchial epithelia (Weihrauch et al., 1999). This high ion permeability may allow for passive extrusion of ammonia via the paracellular pathway much like apical Rh proteins and AMTs have been suggested to act previously. Ventilation of excretory organs by means of cilia, as found on polychaete branchiae (Purschke et al., 2017) and the plicate organ in

mytilid bivalves, might support the excretory process as shown for mussel species of the *Mytilus* family (Thomsen et al., 2016).

While AMTs have been identified in some previously mentioned freshwater species, they are less clearly defined amongst brackish and marine invertebrates. Transcriptome projects of *C. maenas* and the great spider crab *Hyas araneus* suggest that AMTs occur in crustaceans, but their physiological role, subcellular localization and transport characteristics remain unknown. Owing to sometimes multiple branchial expressed AMT isoforms as shown for marine polychaetes (Thiel et al., 2017) (Fig. 4C), one can predict their presence on the apical membrane and that AMTs function as a site of direct  $\text{NH}_4^+$  excretion (Fig. 2B). An additional, highly conserved transporter amongst invertebrates, the ancestral hyperpolarization-activated cyclic nucleotide-gated  $\text{K}^+$  channel (HCN), has recently been found to be involved in transport of hemolymph ammonia into the cytoplasm of branchial epithelial cells of *C. maenas* (Fehsenfeld

and Weihrach, 2016b). Previously, mammalian HCN2 was shown to be capable of  $\text{NH}_4^+$  transport (Carrisoza-Gaytán et al., 2011), although there is a lack of evidence supporting a novel transepithelial ammonia transport via HCN. To date, the physiological role of invertebrate HCN is only linked to signal transduction in olfactory neurons of the spiny lobster *Panulirus argus* (Gisselmann et al., 2005) and chemo-sensitivity in the fruit fly *Drosophila melanogaster* (Chen and Wang, 2012).

**Excretion in soil**

Animals living in the surface water enclosing soil particles face environmental challenges common to both freshwater (low  $\text{Na}^+$  availability) (Haynes and Williams, 1992) and seawater. This is because soil water is not only ion deficient, but also often strongly buffered by organic matter (Federer and Hornbeck, 1985). In the soil nematode *Caenorhabditis elegans*, basolateral uptake of

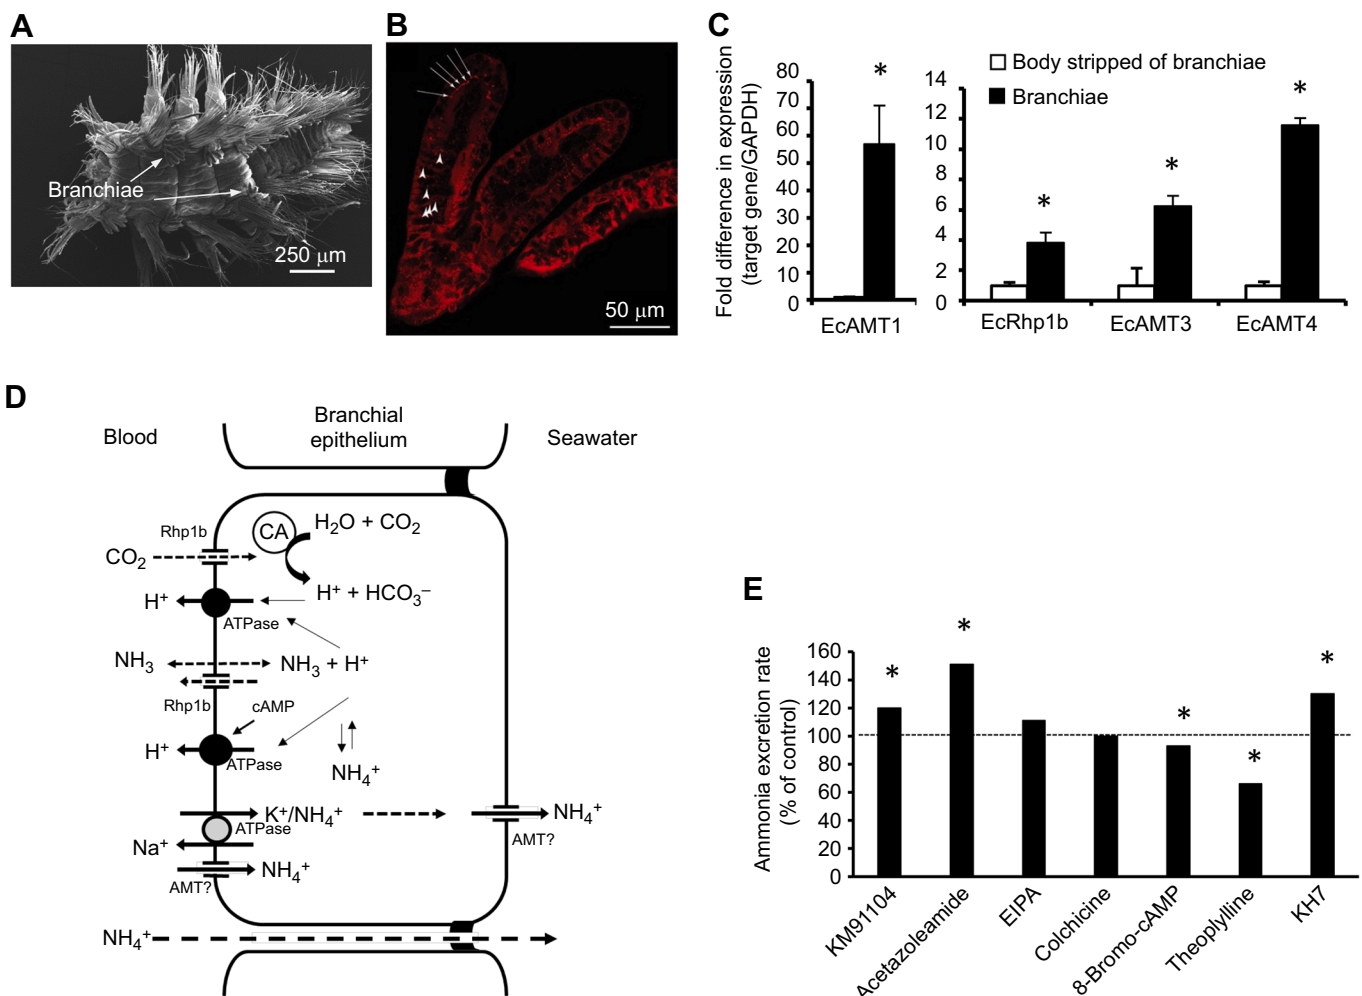

**Fig. 4. Branchial ammonia transport in the marine polychaete *Eurythoe complanata*.** (A,B) Branchiae localized at the notopodia close to the dorsal cirrus (A) and immediately behind the bundle of notochaetae expressing a basolateral localized VAT (subunit B) (B, red staining, arrows). An additional signal is obvious in vesicular structures within the cytoplasm (arrowheads). (C) High relative mRNA expression levels of EcRhp1b, EcAMT1, EcAMT3 and EcAMT4 in the branchiae provides evidence that this tissue is involved in ammonia excretion, with participation of at least three different AMTs (Thiel et al., 2017). \*Significant differences compared with branchial expression levels. (D) Current working model of ammonia transport mechanism in the branchiae of *E. complanata* (for details, see text) based on the effects of various pharmaceuticals on whole-animal ammonia excretion rates (E). Data suggest a mechanism that also allows for ammonia retention, likely for acid–base regulatory purposes. KM91104, inhibitor of VAT; acetazolamide, inhibitor of carbonic anhydrase; EIPA, inhibitor of NHEs, colchicine, inhibitor of microtubule network; 8-bromo-cAMP, cAMP analogue; theophylline, phosphodiesterase inhibitor; KH7, selective inhibitor of the soluble adenylyl cyclase. \*Significant difference compared with controls. Although often significant, the observed effects of the applied agents targeting the ammonia reflux mechanism were rather small, indicating a regulatory mechanism. Branchial excretion of ammonia is thought to be promoted by NKA and facilitated by a predicted apical AMT (dotted line, control) (Thiel et al., 2017).



**Table 1. Summary of studies identifying transporters and enzymes involved in ammonia transport processes in mostly aquatic and soil living invertebrates**

| Phylum           | Species                         | Habitat        | Main organ                  | Physiologically determined proteins                                                      | HEA-sensitive mRNA transcripts                 | Comments and literature                                                                                                                                                                                                |
|------------------|---------------------------------|----------------|-----------------------------|------------------------------------------------------------------------------------------|------------------------------------------------|------------------------------------------------------------------------------------------------------------------------------------------------------------------------------------------------------------------------|
| Crustacea        | <i>Carcinus maenas</i>          | SW<br>BW       | Gills                       | <b>NKA, VAT<sub>c</sub>, Mtn, NHE<sub>b</sub>,<br/>HCN, K<sup>+</sup>-ch<sub>b</sub></b> | HCN                                            | Partially Na <sup>+</sup> -independent<br>AG may be useful in BW <sup>1–5</sup>                                                                                                                                        |
|                  | <i>Metacarcinus magister</i>    | SW             | Gills                       | –                                                                                        | NKA, VAT, RhMM,<br>NHE                         | Gills actively excrete against 16× inwardly<br>directed gradient <sup>6</sup>                                                                                                                                          |
|                  | <i>Cancer pagurus</i>           | SW             | Gills                       | NKA                                                                                      | –                                              | NKA inhibition abolishes excretion; AG<br>negligible <sup>7,8</sup>                                                                                                                                                    |
|                  | <i>Eriocheir sinensis</i>       | SW<br>BW<br>FW | Gills                       | Mtn                                                                                      | –                                              | Ammonia metabolizer (urea/glutamine); AG<br>negligible <sup>7,8,9,10</sup>                                                                                                                                             |
|                  | <i>Portunus tribertuculatus</i> | SW             | Gills                       | Mtn, NKA, VAT                                                                            | Rh, K <sup>+</sup> -ch, NKCC,<br>NHE, VAMP, UT | Ammonia metabolizer (urea/glutamine) <sup>11</sup>                                                                                                                                                                     |
|                  | <i>Callinectes sapidus</i>      | SW<br>BW<br>FW | Gills                       | –                                                                                        | –                                              | AG negligible <sup>12,13</sup>                                                                                                                                                                                         |
|                  | <i>Ocyropsis quadrata</i>       | Land           | Antennal gland              | <b>NKA</b> , likely NHE                                                                  | –                                              | Urine T <sub>Amm</sub> ≥ 116 mmol l <sup>-1</sup> ;<br>gills alkalize urine to volatilize NH <sub>3</sub> <sup>14,15</sup><br>Rectal cavity may act as an acid trap <sup>16–19</sup>                                   |
| Insecta (larvae) | <i>Aedes aegypti</i>            | FW             | Anal papillae               | <b>NKA, VAT, CA, NHE<sub>a</sub>,<br/>AeRh50-1, AeRh50-2,<br/>AMT-1</b>                  | AeRh50-1,<br>AeRh50-2                          |                                                                                                                                                                                                                        |
|                  | <i>Manduca sexta</i>            | Land           | Malpighian tubules /hindgut | <b>VAT, Mtn, NHE,</b>                                                                    | NHE, VAT                                       | Midgut actively absorbs ammonia, passing it<br>to the Mtn and Hg (excretory mechanism<br>unknown) <sup>20,21</sup>                                                                                                     |
| Nematoda         | <i>Caenorhabditis elegans</i>   | Soil           | Hypodermis                  | NKA, VAT, <b>CA</b> , Mt,<br>CeRhr-1, <b>CeRhr-2,<br/>Na<sup>+</sup>-ch<sub>a</sub></b>  | NKA, VAT, CeRhr-<br>1, CeRhr-2                 | Excretory cells most likely play a role <sup>22–25</sup>                                                                                                                                                               |
| Mollusca         | <i>Octopus vulgaris</i>         | SW             | Gills                       | –                                                                                        | –                                              | Gills capable of bidirectional T <sub>Amm</sub> transport<br>(cAMP-dependent); maintains<br>300 μmol l <sup>-1</sup> hemolymph T <sub>Amm</sub> <sup>26</sup><br>Potential involvement of protonephridia <sup>27</sup> |
| Platyhelminthes  | <i>Schmidtea mediterranea</i>   | FW             | Skin                        | <b>NKA, VAT, CA, NHE</b>                                                                 | NKA, Rh                                        |                                                                                                                                                                                                                        |
| Chelicerata      | <i>Limulus polyphemus</i>       | SW             | Book gills                  | –                                                                                        | VAT, CA-2, HCN,<br>LpRh-1, LpRh-2              | Maintains 300 μmol l <sup>-1</sup> T <sub>Amm</sub> hemolymph;<br>coxal gland may be important <sup>28,29</sup>                                                                                                        |
| Annelida         | <i>Eurythoe complanata</i>      | SW             | Branchiae                   | VAT <sub>b</sub> , CA                                                                    | VAT, CA-2,<br>EcAMT1,<br>EcAMT3,<br>EcAMT4     | Bidirectional T <sub>Amm</sub> transport (cAMP-<br>dependent) <sup>30</sup>                                                                                                                                            |
|                  | <i>Nepheleopsis obscura</i>     | FW             | Skin                        | <b>NKA<sub>b</sub>, VAT<sub>a</sub>, CA,<br/>NoRhp-1</b>                                 | NKA, NoRhp                                     | Potential involvement of metanephridia; Na <sup>+</sup> -<br>independent excretion <sup>31,32</sup>                                                                                                                    |

FW, freshwater; BW, brackish water; SW, seawater. AG, antennal gland; Hg, hindgut. NKA, Na<sup>+</sup>/K<sup>+</sup>-ATPase; VAT, V-type H<sup>+</sup>-ATPase; CA, carbonic anhydrase; NHE, cation/H<sup>+</sup> exchanger; Rh, Rh glycoproteins; AMT, ammonia transporter; Mtn, microtubule network; HCN, hyperpolarization-activated cyclic nucleotide-gated K<sup>+</sup> channel; K<sup>+</sup>-ch, potassium channel; Na<sup>+</sup>-ch, sodium channel; VAMP, vesicle-associated membrane protein; UT, urea transporter. Subscript a, apical localization; subscript b, basolateral localization; subscript c, cytoplasmic localization. Proteins in bold font have an important role based on transport studies. <sup>1</sup>Weihrauch et al., 1998; <sup>2</sup>Weihrauch et al., 2002; <sup>3</sup>Fehsenfeld and Weihrauch, 2016b; <sup>4</sup>Fehsenfeld and Weihrauch, 2016a; <sup>5</sup>Weihrauch et al., 2001; <sup>6</sup>Martin et al., 2011; <sup>7</sup>Weihrauch et al., 1999; <sup>8</sup>Weihrauch et al., 2017; <sup>9</sup>Weihrauch et al., 2004; <sup>10</sup>Hong et al., 2007; <sup>11</sup>Ren et al., 2015; <sup>12</sup>Kormanik and Cameron, 1981; <sup>13</sup>Cameron and Batterton, 1978; <sup>14</sup>DeVries and Wolcott, 1993; <sup>15</sup>DeVries et al., 1994; <sup>16</sup>Clark et al., 2007; <sup>17</sup>Patrick et al., 2006; <sup>18</sup>Chasiotis et al., 2016; <sup>19</sup>Durant et al., 2017; <sup>20</sup>Weihrauch, 2006; <sup>21</sup>Blaesse et al., 2010; <sup>22</sup>Adlimoghaddam et al., 2014; <sup>23</sup>Adlimoghaddam et al., 2015; <sup>24</sup>Adlimoghaddam et al., 2016; <sup>25</sup>Adlimoghaddam et al., 2017; <sup>26</sup>Hu et al., 2017; <sup>27</sup>Weihrauch et al., 2012; <sup>28</sup>Henry et al., 1996; <sup>29</sup>Hans et al., 2018; <sup>30</sup>Thiel et al., 2017; <sup>31</sup>Quijada-Rodriguez et al., 2015; <sup>32</sup>Quijada-Rodriguez et al., 2017.

ammonia from the hemolymph into the syncytium of the hypodermis is achieved directly by means of NKA or indirectly by hyperpolarization of the cytosol through K<sup>+</sup> channels and/or AMTs, of which there are four in *C. elegans* (<http://www.wormbase.org>). Apical excretory strategies of *C. elegans* (Fig. 3) appear to exist as a combination of the aforementioned mechanisms employed by freshwater and brackish/seawater invertebrates. Similar to freshwater species, cutaneous ammonia excretion is partially mediated through acidification of the apical surface (Fig. 3A) and an apical Rh protein (RhR-2) (Fig. 3B)

(Adlimoghaddam et al., 2016). Microtubule-dependent vesicular transport and exocytotic excretion of ammonia, as observed in brackish/seawater invertebrates, has also been documented in these nematodes, probably fulfilling an important mechanism that contributes towards apical ammonia trapping that might otherwise be partially compromised in the often well-buffered soil. Pharmacological studies further revealed that apical Na<sup>+</sup> channels, but not NHEs, are involved in the excretory process. Blocking Na<sup>+</sup> channels with low doses of amiloride (Fig. 3D) reduces Na<sup>+</sup> uptake by ~60%, whereas this cation, in turn, serves as a substrate for the

ammonia-transporting ATPase NKA. Inhibition was not observed upon use of EIPA, a specific inhibitor of NHEs, suggesting that the response observed upon use of amiloride, which has been shown to occasionally inhibit both  $\text{Na}^+$  channels as well as NHEs, is due to  $\text{Na}^+$  channel inhibition (Adlimoghaddam et al., 2017).

### Ammonia as a major acid–base homeostatic molecule

Interest in acid–base regulatory processes has recently grown dramatically owing to concerns about the increasing level of ambient  $P_{\text{CO}_2}$  and its subsequent dissolution into aquatic environments, where it reduces pH in aquatic environments – often referred to as ‘ocean acidification’ (Ciais et al., 2013). As environmental pH decreases, animals will likely face numerous acid–base homeostatic challenges, including internal fluid acidosis. While several studies have focused on the bicarbonate buffering system, others have shown that alternative buffers such as proteins and weak acid or weak base equivalents typically play a minor role in maintaining homeostasis (Appelhans et al., 2012). At physiological pH (7.3–7.8) most ammonia ( $\text{pK}_a \sim 9.3$ ) exists in its ionic state (Weiner and Verlander, 2013), where it acts as a  $\text{H}^+$  equivalent whose transport could be used to manipulate extracellular pH. Several transporters are likely to be involved in both acid–base regulatory processes and ammonia excretion by invertebrates, including NKA, VAT and  $\text{K}^+$  channels (HCN) (Fehsenfeld and Weihrauch, 2016a,b; Quijada-Rodriguez et al., 2015), carbonic anhydrase, and Rh proteins (Martin et al., 2011; Perry et al., 2010; Weihrauch et al., 2004). Species-dependent localization of at least some of these transporters may dictate the importance of ammonia transport during an acid–base disturbance at both the extracellular and intracellular levels.

Changes in circulating ammonia concentrations and/or excretory rates have been documented as a response of several invertebrate species upon hypercapnic exposure. The blue mussel *Mytilus edulis* and Mediterranean mussel *Mytilus galloprovincialis* increase ammonia excretion rates as a compensatory mechanism following exposure to high  $P_{\text{CO}_2}$  for 20–24 h (Lindinger et al., 1984; Michaelidis et al., 2005). *C. maenas* similarly responds to hypercapnic exposure by an increase in hemolymph ammonia load and excretion rates (Fehsenfeld and Weihrauch, 2013a). Interestingly, green crabs acclimated to brackish water also excrete near-equal amounts of  $\text{H}^+$ -equivalents and ammonia, suggesting that much of the acid expulsion is excreted as  $\text{NH}_4^+$ . In comparison, upon exposure of *M. magister* to 330 Pa  $P_{\text{CO}_2}$ , the animal accumulates  $\text{HCO}_3^-$  to compensate for extracellular pH disturbance whilst reducing branchial ammonia excretion rates and experiencing metabolic depression similar to that of the Norway lobster *Nephrops norvegicus* (Hagerman et al., 1990), which lowers hemolymph ammonia load (Hans et al., 2014). Overall, while the response of animals to hypercapnia varies, it is often linked to changes in ammonia excretion processes.

### Ammonia retention and a role of acid–base balance

Recent studies indicate that some marine invertebrates maintain elevated levels of potentially toxic ammonia in their hemolymph, although a leaky branchial epithelium should not hinder passive excretion into a low-ammonia environment. Perfused gills of the common octopus *Octopus vulgaris* excrete ammonia; however, experimental perfusion of levels of blood ammonia below  $300 \mu\text{mol l}^{-1}$  results in a net secretion of metabolically produced ammonia directed to the bloodstream (Hu et al., 2017). The American horseshoe crab *Limulus polyphemus* normally maintains  $\sim 300 \mu\text{mol l}^{-1}$  hemolymph ammonia, which was unusually

unaltered following exposure to HEA ( $1 \text{ mmol l}^{-1}$ ) for 7–9 days (Hans et al., 2018). Typically, HEA exposure causes hemolymph ammonia to accumulate as occurs in *M. magister* (Martin et al., 2011) and *C. maenas* (Zimmer and Wood, 2017). While the purpose and mechanism underlying this retention is far from understood, use of hypothetical ammonia excretory models of *E. complanata* branchiae (Fig. 4D) has begun to suggest the molecular machinery that would be in place to collect as well as excrete ammonia from the blood. Immunohistochemical analysis of branchiae in *E. complanata* (Fig. 4A,B) has suggested that the blood is acidified by a basolateral VAT to trap ammonia which is further supported by pharmacological interventions. Direct activation of branchial and basolateral localized VAT (Fig. 4A,B), as well as increased activation through increased cAMP bioavailability, significantly reduced whole-animal ammonia excretion (Fig. 4E) (Thiel et al., 2017). Such mechanisms could be in place in some ammonia-retaining animals that may use ammonia as a buffering agent, or for other, yet unknown physiological processes where ammonia homeostasis is desirable.

### Concluding remarks

While a general framework of ammonia excretion in aquatic invertebrates has been synthesized in some species, as summarized in Table 1, many gaps remain. Internal excretory organs are particularly under-studied. Hypothetical models are, as they stand, based on educated guesses because a complete understanding of the involved transporters and pathways does not yet exist. Technological advances such as the scanning ion-selective electrode technique (SIET) allow investigation of smaller, less accessible tissues and can determine excretory processes occurring across internal epithelia. Novel transporters such as AMTs and HCNs require further investigation to determine their importance in ammonia excretion. Most investigations have identified such transporters at the mRNA expression level but not physiologically. Localization, functional expression, and pharmaceutical experiments should be completed to allow for synthesis of more accurate hypothetical working models. Finally, despite the potential toxicity of ammonia, some invertebrates retain extracellular ammonia. These recent findings require mechanistic experimentation in a greater variety of species to determine how it happens and the species distribution of this behavior.

### Competing interests

The authors declare no competing or financial interests.

### Funding

This contribution was supported by a Natural Sciences and Engineering Research Council of Canada Discovery Grant to D.W.

### References

- Adlimoghaddam, A., Weihrauch, D. and O'Donnell, M. J. (2014). Localization of  $\text{K}^+$ ,  $\text{H}^+$ ,  $\text{Na}^+$  and  $\text{Ca}^{2+}$  fluxes to the excretory pore in *Caenorhabditis elegans*: application of scanning ion-selective microelectrodes. *J. Exp. Biol.* **217**, 4119–4122.
- Adlimoghaddam, A., Boeckstaens, M., Marini, A.-M., Treberg, J. R., Brassinga, A.-K. C. and Weihrauch, D. (2015). Ammonia excretion in *Caenorhabditis elegans*: mechanism and evidence of ammonia transport of the Rh-protein CeRhr-1. *J. Exp. Biol.* **218**, 675–683.
- Adlimoghaddam, A., O'Donnell, M. J., Kormish, J., Banh, S., Treberg, J. R., Merz, D. and Weihrauch, D. (2016). Ammonia excretion in *Caenorhabditis elegans*: physiological and molecular characterization of the rhr-2 knock-out mutant. *Comp. Biochem. Physiol. A Mol. Integr. Physiol.* **195**, 46–54.
- Adlimoghaddam, A., O'Donnell, M. J., Quijada-Rodriguez, A. and Weihrauch, D. (2017). Sodium- hydrogen exchangers in *Caenorhabditis elegans*: investigations towards their potential role in hypodermal  $\text{H}^+$  excretion,  $\text{Na}^+$  uptake, and ammonia excretion, as well as acid-base balance. *Can. J. Zool.* **95**, 623–632.

- Appelans, Y. S., Thomsen, J., Pansch, C., Melzner, F. and Wahl, M. (2012). Sour times: seawater acidification effects on growth, feeding behaviour and acid-base status of *Asterias rubens* and *Carcinus maenas*. *Mar. Ecol. Prog. Ser.* **459**, 85-98.
- Blaesse, A.-K., Broehan, G., Meyer, H., Merzendorfer, H. and Weihrauch, D. (2010). Ammonia uptake in *Manduca sexta* midgut is mediated by an amiloride sensitive cation/proton exchanger: transport studies and mRNA expression analysis of NHE7, 9, NHE8, and V-ATPase (subunit D). *Comp. Biochem. Physiol. A Mol. Integr. Physiol.* **157**, 364-376.
- Cameron, J. N. and Batterton, C. V. (1978). Antennal gland function in the freshwater blue crab, *Callinectes sapidus*: water, electrolyte, acid-base and ammonia excretion. *J. Coamp. Physiol.* **123**, 143-148.
- Campbell, J. W. (1991). Excretory nitrogen metabolism. In *Environmental and Metabolic Animal Physiology* (ed. C. L. Prosser), pp. 277-324. New York: Wiley.
- Carrisoza-Gaytán, R., Rangel, C., Salvador, C., Saldaña-Meyer, R., Escalona, C., Satlin, L. M., Liu, W., Zavielowitz, B., Trujillo, J., Bobadilla, N. A. et al. (2011). The hyperpolarization-activated cyclic nucleotide-gated HCN2 channel transports ammonium in the distal nephron. *Kidney Int.* **80**, 832-840.
- Chan, J. D., Zhang, D., Liu, X., Zarowiecki, M. Z., Berriman, M. and Marchant, J. S. (2016). Dataset for a *Dugesia japonica* de novo transcriptome assembly, utilized for defining the voltage-gated like ion channel superfamily. *Data Brief* **9**, 1044-1047.
- Chasiotis, H., Ionescu, A., Misyura, L., Bui, P., Fazio, K., Wang, J., Patrick, M., Weihrauch, D. and Donini, A. (2016). An animal homolog of plant Mep/Amt transporters promotes ammonia excretion by the anal papillae of the disease vector mosquito, *Aedes aegypti*. *J. Exp. Biol.* **219**, 1346-1355.
- Chen, J.-C. and Kou, Y.-Z. (1992). Effects of ammonia on growth and molting of *Penaeus japonicus* juveniles. *Aquaculture* **104**, 249-260.
- Chen, Z. J. and Wang, Z. R. (2012). Functional study of hyperpolarization activated channel (Ih) in *Drosophila* behavior. *Sci. China Life Sci.* **55**, 2-7.
- Choe, H., Sackin, H. and Palmer, L. G. (2000). Permeation properties of inward-rectifier potassium channels and their molecular determinants. *J. Gen. Physiol.* **115**, 391-404.
- Ciais, P., Sabine, C., Bala, G., Bopp, L., Brovkin, V., Canadell, J., Chhabra, A., DeFries, R., Galloway, J., Heimann, M. et al. (2013). Carbon and other biogeochemical cycles. In: *Climate Change 2013: The Physical Science Basis. Contribution of Working Group I to the Fifth Assessment Report of the Intergovernmental Panel on Climate Change* (ed. T. F. Stocker, D. Qin, G.-K. Plattner, M. Tignor, S. K. Allen, J. Boschung, A. Nauels, Y. Xia, V. Bex and P. M. Midgale), pp. 465-570. Cambridge: Cambridge University Press.
- Clark, T. M., Vieira, M. A. L., Huegel, K. L., Flury, D. and Carper, M. (2007). Strategies for regulation of hemolymph pH in acidic and alkaline water by the larval mosquito *Aedes aegypti* (L.) (Diptera: Culicidae). *J. Exp. Biol.* **210**, 4359-4367.
- DeVries, M. C. and Wolcott, D. L. (1993). Gaseous ammonia evolution is coupled to reprocessing of urine at the gills of ghost crabs. *J. Exp. Zool.* **267**, 97-103.
- DeVries, M. C., Wolcott, D. L. and Holliday, C. W. (1994). High ammonia and low pH in the urine of the ghost crab, *Ocyropsis quadrata*. *Biol. Bull.* **186**, 342-348.
- Durant, A. C., Chasiotis, H., Misyura, L. and Donini, A. (2017). *Aedes aegypti* Rhesus glycoproteins contribute to ammonia excretion by larval anal papillae. *J. Exp. Biol.* **220**, 588-596.
- Eddy, F. B. (2005). Ammonia in estuaries and effects on fish. *J. Fish Biol.* **67**, 1495-1513.
- Endeward, V., Cartron, J.-P., Ripoche, P. and Gros, G. (2008). RhAG protein of the Rhesus complex is a CO<sub>2</sub> channel in the human red cell membrane. *FASEB J.* **22**, 64-73.
- Federer, C. A. and Hornbeck, J. W. (1985). The buffer capacity of forest soils in New England. *Water, Air, and Soil Pollution* **26**, 163-173.
- Fehsenfeld, S. and Weihrauch, D. (2013). Differential acid-base regulation in various gills of the green crab *Carcinus maenas*: effects of elevated environmental pCO<sub>2</sub>. *Comp. Biochem. Physiol. A Mol. Integr. Physiol.* **164**, 54-65.
- Fehsenfeld, S. and Weihrauch, D. (2016a). Mechanisms of acid-base regulation in seawater-acclimated green crabs (*Carcinus maenas*). *Can. J. Zool.* **94**, 95-107.
- Fehsenfeld, S. and Weihrauch, D. (2016b). The role of an ancestral hyperpolarization-activated cyclic nucleotide-gated K<sup>+</sup> channel in branchial acid-base regulation in the green crab, *Carcinus maenas*. *J. Exp. Biol.* **219**, 887-896.
- Freire, C. A., Onken, H. and McNamara, J. C. (2008). A structure-function analysis of ion transport in crustacean gills and excretory organs. *Comp. Biochem. Physiol. A Mol. Integr. Physiol.* **151**, 272-304.
- Garrels, R. M. and Thomson, M. E. (1962). A chemical model for sea water at 25°C and one atmosphere total pressure. *Am. J. Sci.* **260**, 57-66.
- Geyer, R. R., Parker, M. D., Toye, A. M., Boron, W. F. and Musa-Aziz, R. (2013). Relative CO<sub>2</sub>/NH<sub>3</sub> permeabilities of human RhAG, RhBG and RhCG. *J. Membr. Biol.* **246**, 915-926.
- Gisselmann, G., Marx, T., Bobkov, Y., Wetzel, C. H., Neuhaus, E. M., Ache, B. W. and Hatt, H. (2005). Molecular and functional characterization of an I(h)-channel from lobster olfactory receptor neurons. *Eur. J. Neurosci.* **21**, 1635-1647.
- Gruswitz, F., Chaudhary, S., Ho, J. D., Schlessinger, A., Pezeshki, B., Ho, C.-M., Sali, A., Westhoff, C. M. and Stroud, R. M. (2010). Function of human Rh based on structure of RhCG at 2.1 Å. *Proc. Natl. Acad. Sci. USA* **107**, 9638-9643.
- Hagerman, L., Søndergaard, T., Weile, K., Hosie, D. and Uglow, R. F. (1990). Aspects of blood physiology and ammonia excretion in *Nephrops norvegicus* under hypoxia. *Comp. Biochem. Physiol. A* **97**, 51-55.
- Hans, S., Fehsenfeld, S., Treberg, J. R. and Weihrauch, D. (2014). Acid-base regulation in the Dungeness crab (*Metacarcinus magister*). *Mar. Biol.* **161**, 1179-1193.
- Hans, S., Quijada-Rodriguez, A. R., Allen, G. J. P., Onken, H., Treberg, J. R. and Weihrauch, D. (2018). Ammonia excretion and acid-base regulation in the American horseshoe crab, *Limulus polyphemus*. *J. Exp. Biol.* **221**, jeb151894.
- Harris, J. O., Maguire, G. B., Edwards, S. and Hindrum, S. M. (1998). Effect of ammonia on the growth rate and oxygen consumption of juvenile greenlip abalone, *Haliotis laevigata* Donovan. *Aquaculture* **160**, 259-272.
- Harris, R. R., Coley, S., Collins, S. and McCabe, R. (2001). Ammonia uptake and its effects on ionoregulation in the freshwater crayfish *Pacifastacus leniusculus* (Dana). *J. Comp. Physiol. B* **171**, 681-693.
- Haynes, R. J. and Williams, P. H. (1992). Changes in soil solution composition and pH in urine-affected areas of pasture. *J. Soil Sci.* **43**, 323-334.
- Henry, R. P., Jackson, S. A. and Mangum, C. P. (1996). Ultrastructure and transport-related enzymes of the gills and coxal gland of the horseshoe crab *Limulus polyphemus*. *Biol. Bull.* **191**, 241-250.
- Henry, R. P., Lucu, Č., Onken, H. and Weihrauch, D. (2012). Multiple functions of the crustacean gill: osmotic/ionic regulation, acid-base balance, ammonia excretion, and bioaccumulation of toxic metals. *Front. Physiol.* **3**, 431.
- Hong, M., Chen, L., Sun, X., Gu, S., Zhang, L. and Chen, Y. (2007). Metabolic and immune responses in Chinese mitten-handed crab (*Eriocheir sinensis*) juveniles exposed to elevated ambient ammonia. *Comp. Biochem. Physiol. C Toxicol. Pharmacol.* **145**, 363-369.
- Hu, M. Y., Sung, P.-H., Guh, Y.-J., Lee, J.-R., Hwang, P.-P., Weihrauch, D. and Tseng, Y.-C. (2017). Perfused gills reveal fundamental principles of pH regulation and ammonia homeostasis in the cephalopod *Octopus vulgaris*. *Front. Physiol.* **8**, 162.
- Huang, C. H. and Peng, J. (2005). Evolutionary conservation and diversification of Rh family genes and proteins. *Proc. Natl. Acad. Sci. USA* **102**, 15512-15517.
- Ip, Y. K. and Chew, S. F. (2010). Ammonia production, excretion, toxicity and defense in fish: a review. *Front. Physiol.* **1**, 1-20.
- Ip, Y. K., Chew, S. E. and Randall, D. J. (2001). Ammonia toxicity, tolerance and excretion. In *Fish Physiology*, vol. 20 (ed. P. A. Wright and P. M. Anderson), pp. 109-148. San Diego, CA: Academic Press.
- Kormanik, G. A. and Cameron, J. N. (1981). Ammonia excretion in the seawater blue crab (*Callinectes sapidus*) occurs by diffusion, and not Na<sup>+</sup>/K<sup>+</sup> exchange. *J. Comp. Physiol. B* **141**, 457-462.
- Larsen, E. H., Deaton, L. E., Onken, H., O'Donnell, M., Grosell, M., Dantzer, W. H. and Weihrauch, D. (2014). Osmoregulation and excretion. *Comp. Physiol.* **4**, 405-573.
- Le Moullac, G. and Haffner, P. (2000). Environmental factors affecting immune responses in Crustacea. *Aquaculture* **191**, 121-131.
- Leone, F. A., Lucena, M. N., Garçon, D. P., Pinto, M. R. and McNamara, J. C. (2016). Gill ion transport ATPases and ammonia excretion in aquatic crustaceans. In *Acid-Base Balance and Nitrogen Excretion in Invertebrates* (ed. D. Weihrauch and M. O'Donnell), pp. 1-306. Cham, Switzerland: Springer Nature.
- Lindinger, M. I., Lauren, D. J. and McDonald, D. G. (1984). Acid-base-balance in the sea mussel, *Mytilus edulis*. 3. Effects of environmental hypercapnia on intracellular acid-base-balance. *Mar. Biol. Letters* **5**, 371-381.
- Linton, M. S., Wright, J. C. and Howe, C. G. (2017). Nitrogenous waste metabolism within terrestrial crustacea, with special reference to purin deposits and their metabolism. In *Acid-Base Balance and Nitrogen Excretion in Invertebrates* (ed. D. Weihrauch and M. O'Donnell), pp. 1-306. Cham: Springer Nature.
- Martin, M., Fehsenfeld, S., Sourial, M. M. and Weihrauch, D. (2011). Effects of high environmental ammonia on branchial ammonia excretion rates and tissue Rh-protein mRNA expression levels in seawater acclimated Dungeness crab *Metacarcinus magister*. *Comp. Biochem. Physiol. A Mol. Integr. Physiol.* **160**, 267-277.
- McDonald, T. R. and Ward, J. M. (2016). Evolution of electrogenic ammonium transporters (AMTs). *Front. Plant Sci.* **7**, 352.
- McKenzie, D. J., Shingles, A. and Taylor, E. W. (2003). Sub-lethal plasma ammonia accumulation and the exercise performance of salmonids. *Comp. Biochem. Physiol. A Mol. Integr. Physiol.* **135**, 515-526.
- McKenzie, D. J., Shingles, A., Claireaux, G. and Domenici, P. (2009). Sublethal concentrations of ammonia impair performance of the teleost fast-start escape response. *Physiol. Biochem. Zool.* **82**, 353-362.
- Michaelidis, B., Ouzounis, C., Paleras, A. and Pörtner, H. O. (2005). Effects of long-term moderate hypercapnia on acid-base balance and growth rate in marine mussels *Mytilus galloprovincialis*. *Mar. Ecol. Prog. Ser.* **293**, 109-118.
- Neuhäuser, B. and Ludewig, U. (2014). Uncoupling of ionic currents from substrate transport in the plant ammonium transporter AtAMT1;2. *J. Biol. Chem.* **289**, 11650-11655.
- Onken, H. and Riestenpatt, S. (1998). NaCl absorption across split gill lamellae of hyperregulating crabs, transport mechanisms and their regulation. *Comp. Biochem. Physiol. A* **119**, 883-893.

- Patrick, M. L., Aimanova, K., Sanders, H. R. and Gill, S. S. (2006). P-type Na<sup>+</sup>/K<sup>+</sup>-ATPase and V-type H<sup>+</sup>-ATPase expression patterns in the osmoregulatory organs of larval and adult mosquito *Aedes aegypti*. *J. Exp. Biol.* **209**, 4638-4651.
- Perry, S. F., Braun, M. H., Noland, M., Dawdy, J. and Walsh, P. J. (2010). Do zebrafish Rh proteins act as dual ammonia-CO<sub>2</sub> channels? *J. Exp. Zool. A Ecol. Genet. Physiol.* **313**, 618-621.
- Pitts, R. J., Derryberry, S. L., Jr, Pulous, F. E. and Zwiebel, L. J. (2014). Antennal-expressed ammonium transporters in the malaria vector mosquito *Anopheles gambiae*. *PLoS ONE* **9**, e111858.
- Prather, C. M., Pelini, S. L., Laws, A., Rivest, E., Woltz, M., Bloch, C. P., Del Toro, I., Ho, C.-K., Kominoski, J., Newbold, T. A. et al. (2013). Invertebrates, ecosystem services and climate change. *Biol. Rev. Camb. Philos. Soc.* **88**, 327-348.
- Purschke, G., Hugenschütt, M., Ohlmeyer, L., Meyer, H. and Weihrauch, D. (2017). Structural analysis of the branchiae and dorsal cirri in *Eurythoe complanata* (Annelida, Amphinomidia). *Zoomorphology* **136**, 1-18.
- Quijada-Rodriguez, A. R., Treberg, J. R. and Weihrauch, D. (2015). Mechanism of ammonia excretion in the freshwater leech *Nepheleopsis obscura*: characterization of a primitive Rh protein and effects of high environmental ammonia. *Am. J. Physiol. Regul. Integr. Comp. Physiol.* **309**, R692-R705.
- Quijada-Rodriguez, A. R., Schultz, A. G., Wilson, J. M., He, Y., Allen, G. J. P., Goss, G. G. and Weihrauch, D. (2017). Ammonia independent sodium uptake mediated by Na<sup>+</sup> channels and NHEs in the freshwater ribbon leech *Nepheleopsis obscura*. *J. Exp. Biol.* **220**, 3270-3279.
- Randall, D. J. and Tsui, T. K. N. (2002). Ammonia toxicity in fish. *Mar. Pollut. Bull.* **45**, 17-23.
- Ren, Q., Pan, L., Zhao, Q. and Si, L. (2015). Ammonia and urea excretion in the swimming crab *Portunus trituberculatus* exposed to elevated ambient ammonia-N. *Comp. Biochem. Physiol. A Mol. Integr. Physiol.* **187**, 48-54.
- Shingles, A., McKenzie, D. J., Taylor, E. W., Moretti, A., Butler, P. J. and Ceradini, S. (2001). Effects of sublethal ammonia exposure on swimming performance in rainbow trout (*Oncorhynchus mykiss*). *J. Exp. Biol.* **204**, 2691-2698.
- Sun, J. J. and Ding, M. L. (1999). Effect of ammonia-N on anti-disease ability of *Penaeus chinensis*. *Oceanol. Limnol. Sinia* **30**, 267-272.
- Suzuki, T. (1988). Ultrastructure of the excretory organs and urinary component of the marine bivalve *Atrina* (*S.*) *pectinata*. *Comp. Biochem. Physiol.* **90A**, 79-83.
- Thiel, D., Hugenschütt, M., Meyer, H., Paululat, A., Quijada-Rodriguez, A. R., Purschke, G. and Weihrauch, D. (2017). Ammonia excretion in the marine polychaete *Eurythoe complanata* (Annelida). *J. Exp. Biol.* **220**, 425-436.
- Thomsen, J., Himmerkus, N., Holland, N., Sartoris, F. J., Bleich, M. and Tresguerres, M. (2016). Ammonia excretion in mytilid mussels is facilitated by ciliary beating. *J. Exp. Biol.* **219**, 2300-2310.
- Towle, D. W., Rushton, M. E., Heidysch, D., Magnani, J. J., Rose, M. J., Amstutz, A., Jordan, M. K., Shearer, D. W. and Wu, W. S. (1997). Sodium/proton antiporter in the euryhaline crab *Carcinus maenas*: molecular cloning, expression and tissue distribution. *J. Exp. Biol.* **200**, 1003-1014.
- Tsui, T. K., Randall, D. J., Chew, S. F., Jin, Y., Wilson, J. M. and Ip, Y. K. (2002). Accumulation of ammonia in the body and NH<sub>3</sub> volatilization from alkaline regions of the body surface during ammonia loading and exposure to air in the weather loach *Misgurnus anguillicaudatus*. *J. Exp. Biol.* **205**, 651-659.
- Weber, W. M., Dannenmaier, B. and Clauss, W. (1993). Ion transport across leech integument. I. Electrogenic Na<sup>+</sup> transport and current fluctuation analysis of the apical Na<sup>+</sup> channel. *J. Comp. Physiol. B* **163**, 153-159.
- Weihrauch, D. (2006). Active ammonia absorption in the midgut of the Tobacco hornworm *Manduca sexta* L.: transport studies and mRNA expression analysis of a Rhesus-like ammonia transporter. *Insect Biochem. Mol. Biol.* **36**, 808-821.
- Weihrauch, D., Becker, W., Postel, U., Riestenpatt, S. and Siebers, D. (1998). Active excretion of ammonia across the gills of the shore crab *Carcinus maenas* and its relation to osmoregulatory ion uptake. *J. Comp. Physiol. B* **168**, 364-376.
- Weihrauch, D., Becker, W., Postel, U., Luck-Kopp, S. and Siebers, D. (1999). Potential of active excretion of ammonia in three different haline species of crabs. *J. Comp. Physiol. B* **169**, 25-37.
- Weihrauch, D., Ziegler, A., Siebers, D. and Towle, D. W. (2001). Molecular characterization of V-type H<sup>+</sup>-ATPase (B-subunit) in gills of euryhaline crabs and its physiological role in osmoregulatory ion uptake. *J. Exp. Biol.* **204**, 25-37.
- Weihrauch, D., Ziegler, A., Siebers, D. and Towle, D. W. (2002). Active ammonia excretion across the gills of the green shore crab *Carcinus maenas*: participation of Na<sup>+</sup>/K<sup>+</sup>-ATPase, V-type H<sup>+</sup>-ATPase and functional microtubules. *J. Exp. Biol.* **205**, 2765-2775.
- Weihrauch, D., Morris, S. and Towle, D. W. (2004). Ammonia excretion in aquatic and terrestrial crabs. *J. Exp. Biol.* **207**, 4491-4504.
- Weihrauch, D., Wilkie, M. P. and Walsh, P. J. (2009). Ammonia and urea transporters in gills of fish and aquatic crustaceans. *J. Exp. Biol.* **212**, 1716-1730.
- Weihrauch, D., Donini, A. and O'Donnell, M. J. (2011). Ammonia transport by terrestrial and aquatic insects. *J. Insect Physiol.* **58**, 473-487.
- Weihrauch, D., Chan, A. C., Meyer, H., Doring, C., Sourial, M. M. and O'Donnell, M. J. (2012). Ammonia excretion in the freshwater planarian *Schmidtea mediterranea*. *J. Exp. Biol.* **215**, 3242-3253.
- Weihrauch, D., Fehsenfeld, S. and Quijada-Rodriguez, A. R. (2017). Nitrogen Excretion in Aquatic Crustaceans. In *Acid-Base Balance and Nitrogen Excretion in Invertebrates* (ed. D. Weihrauch and M. O'Donnell), pp. 1-25. Cham, Switzerland: Springer Nature.
- Weiner, I. D. and Verlander, J. W. (2013). Renal ammonia metabolism and transport. *Comp. Physiol.* **3**, 201-220.
- Wicks, B. J., Joensen, R., Tang, Q. and Randall, D. J. (2002). Swimming and ammonia toxicity in salmonids: the effect of sub lethal ammonia exposure on the swimming performance of coho salmon and the acute toxicity of ammonia in swimming and resting rainbow trout. *Aquat. Toxicol.* **59**, 55-69.
- Wilkie, M. P. (1997). Mechanisms of ammonia excretion across fish gills. *Comp. Biochem. Physiol. A* **118**, 39-50.
- Wilson, E. O. (1987). The little things that run the world (the importance and conservation of invertebrates). *Conserv. Biol.* **1**, 344-346.
- Wright, P. A. (1995). Nitrogen excretion: three end products, many physiological roles. *J. Exp. Biol.* **198**, 273-281.
- Young-Lai, W. W., Charmantier-Daures, M. and Charmantier, G. (1991). Effect of ammonia on survival and osmoregulation in different life stages of the lobster *Homarus americanus*. *Mar. Biol.* **110**, 293-300.
- Zimmer, A. M. and Wood, C. M. (2017). Acute exposure to high environmental ammonia (HEA) triggers the emersion response in the green shore crab. *Comp. Biochem. Physiol. A Mol. Integr. Physiol.* **204**, 65-75.
